# Supplementary material for: High incidence of atrial fibrillation in patients treated with ibrutinib
Source: PubMed Central journal article supplement — Open Heart. 2019 May 8;6(1):e001049. doi: 10.1136/openhrt-2019-001049 (PMC6519413; doi:10.1136/openhrt-2019-001049), 2019-05-08
Supplement: openhrt-2019-001049supp001.pdf [file openhrt-2019-001049supp001.pdf]

# Supplementary Files

## Supplementary File 1. Distribution of antithrombotic therapy and minor bleeding.

APT, antiplatelet therapy; DOA, direct oral anticoagulant; IRAF, ibrutinib-related atrial fibrillation; LMWH, low molecular weight heparin; VKA, vitamin K antagonist

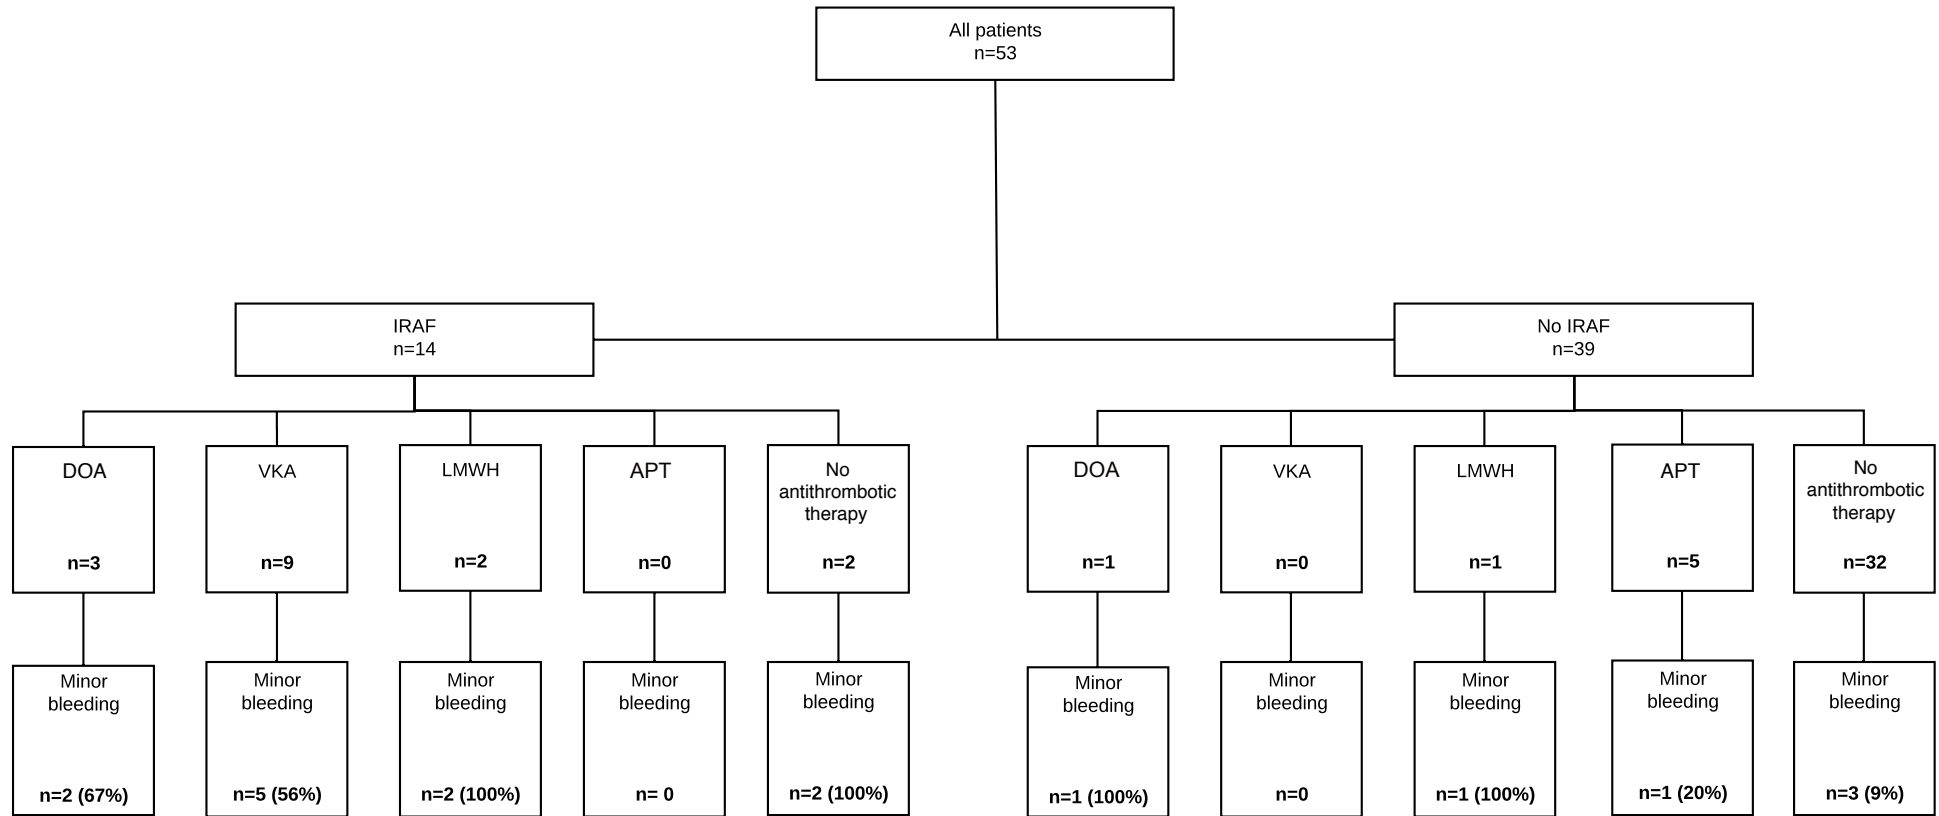

# Supplementary Files

## Supplementary File 2. Management of ibrutinib therapy according to ibrutinib-related atrial fibrillation (IRAF).

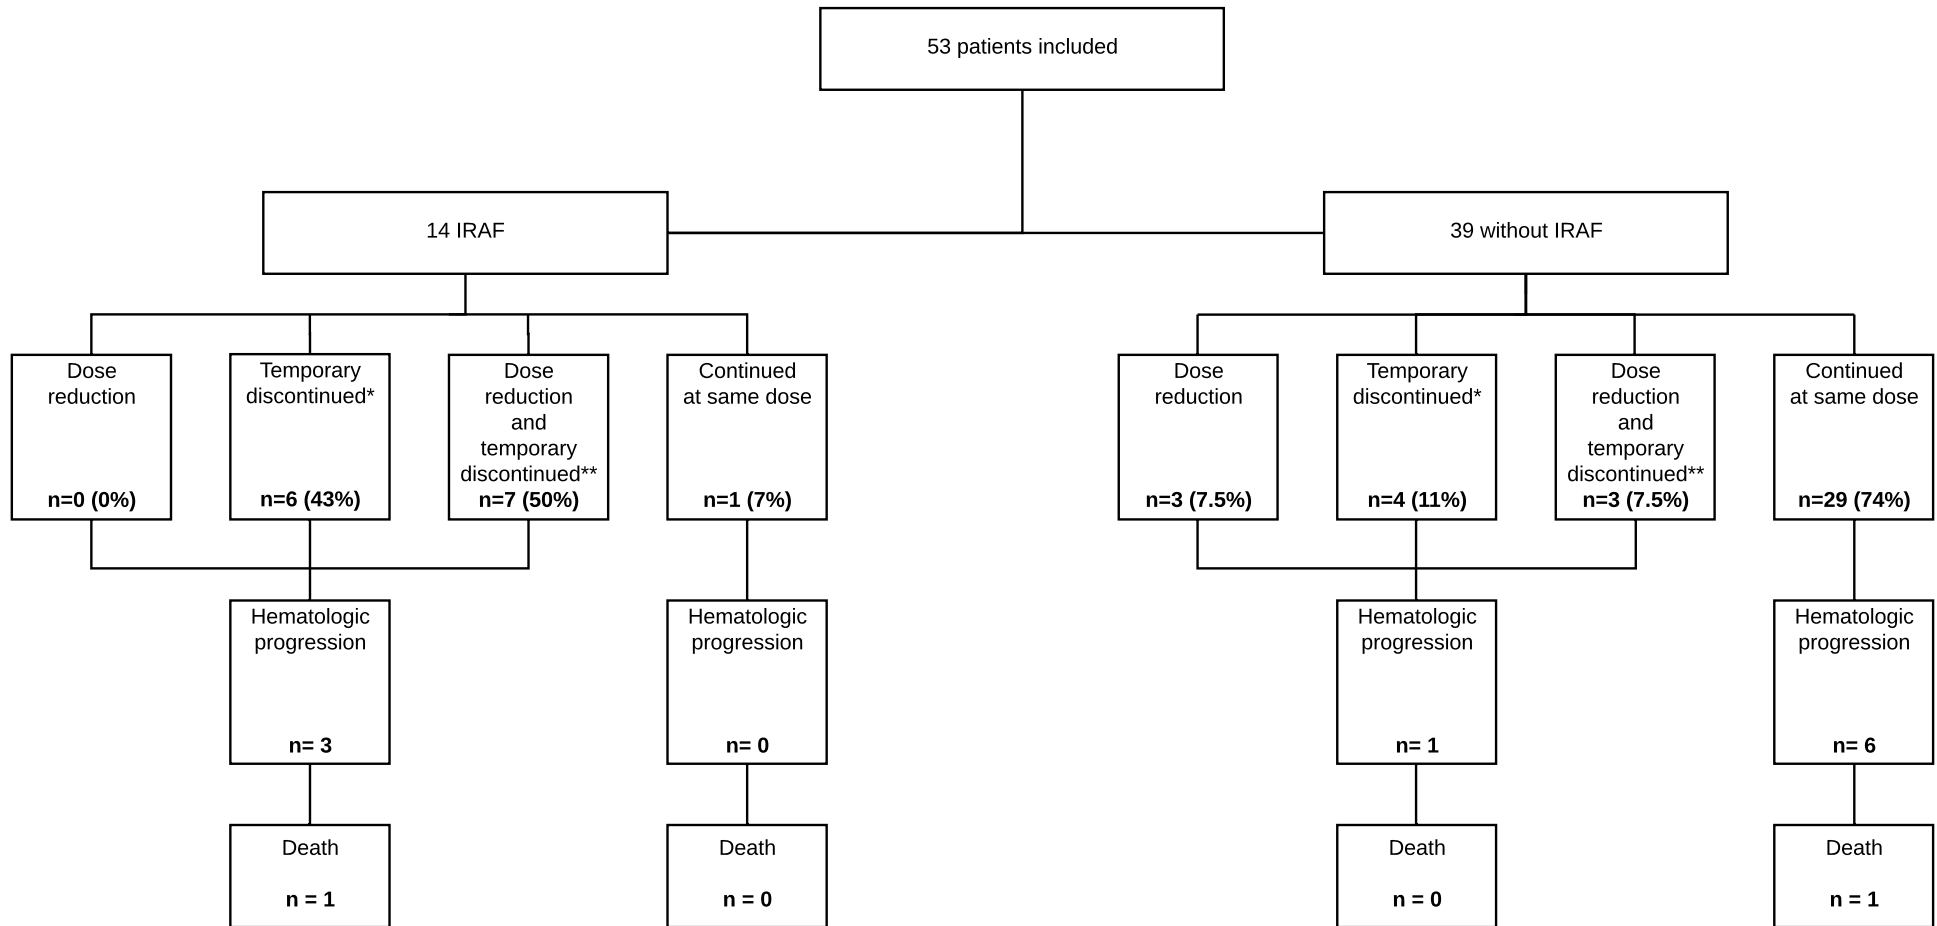

# Supplementary Files

## Supplementary File 3. Details of patients who experienced ibrutinib-related atrial fibrillation (IRAF).

1<sup>st</sup>, first diagnosed AF; ABL, ablation; AR, antiarrhythmic drug; CTCAE, Common Terminology Criteria for Adverse Events v5.0; D, temporary suspension; DOA, direct oral anticoagulant; EC, electric cardioversion; ELR, external loop recorder; EHRA, European Heart Rhythm Association classification; LMWH, low molecular weight heparin; Ls, long-standing persistent AF; P, permanent AF; Pa, Paroxysmal AF; R, rate control; Re, reduced dose; U, unchanged; VKA, vitamin K antagonist

| Patient      | IRAF grade |          |          |          |          |          |          |          |           |          | Diagnosis |                  |               | Anticoagulant therapy |          |           |          | Rate vs. rhythm control strategy |          |          |          | Evolution of IRAF      |          |          |          |                                   |          |          |          | Ibrutinib management |    |   |   |
|--------------|------------|----------|----------|----------|----------|----------|----------|----------|-----------|----------|-----------|------------------|---------------|-----------------------|----------|-----------|----------|----------------------------------|----------|----------|----------|------------------------|----------|----------|----------|-----------------------------------|----------|----------|----------|----------------------|----|---|---|
|              | CTCAE      |          |          |          |          | EHRA     |          |          |           |          | ECG       | 24h-Holter (n=4) | 7d-ELR (n=17) | No                    | VKA      | LMWH      | DOA      | R                                | AR       | EC       | ABL      | IRAF type at diagnosis |          |          |          | IRAF type at the end of follow up |          |          |          | U                    | Re | D |   |
|              | 1          | 2        | 3        | 4        | 5        | 1        | 2        | 3        | 4         |          |           |                  |               |                       |          |           |          |                                  |          |          |          | 1 <sup>st</sup>        | Pa       | Ls       | P        | 1 <sup>st</sup>                   | Pa       | Ls       | P        |                      |    |   |   |
| no.1         | x          |          |          |          |          |          |          |          |           | x        |           |                  |               | x                     |          |           |          | x                                |          |          |          | x                      |          |          |          |                                   |          |          |          | x                    |    |   | x |
| no.2*        | x          |          |          |          |          | x        |          |          |           | x        |           |                  | x             |                       |          |           | x        |                                  |          |          |          | x                      |          |          |          | x                                 |          |          |          |                      | x  |   |   |
| no.3         | x          |          |          |          |          | x        |          |          |           |          | x         |                  |               | x                     |          |           |          |                                  | x        |          |          |                        | x        |          |          |                                   |          | x        |          |                      |    | x |   |
| no.4         | x          |          |          |          |          | x        |          |          |           | x        |           |                  |               | x                     |          |           | x        | x                                | x        | x        |          |                        | x        |          |          |                                   |          | x        | x        |                      |    |   |   |
| no.5         |            |          | x        |          |          |          |          |          | x         |          | x         |                  |               | x                     | x        | x         | x        | x                                |          |          |          | x                      |          |          |          | x                                 |          |          |          | x                    | x  |   |   |
| no.6         |            |          |          | x        |          |          |          |          | x         | x        |           |                  | x             |                       |          |           |          |                                  |          |          |          | x                      |          |          |          | x                                 |          |          |          |                      | x  |   |   |
| no.7         | x          |          |          |          |          | x        |          |          |           |          |           |                  |               | x                     |          |           | x        |                                  |          |          |          | x                      |          |          |          |                                   | x        |          |          | x                    |    |   |   |
| no.8         |            |          | x        |          |          |          |          |          | x         | x        |           |                  |               |                       | x        |           |          |                                  |          |          |          |                        | x        |          |          |                                   |          | x        |          |                      |    | x |   |
| no.9         | x          |          |          |          |          | x        |          |          |           | x        |           |                  |               |                       | x        | x         |          |                                  |          |          |          | x                      |          |          |          | x                                 |          |          |          | x                    |    |   |   |
| no.10        |            |          | x        |          |          | x        |          |          |           | x        |           |                  |               | x                     |          |           |          |                                  |          | x        |          |                        |          |          |          |                                   |          |          |          |                      |    |   | x |
| no.11        |            | x        |          |          |          |          | x        |          |           | x        |           |                  |               | x                     |          |           | x        |                                  |          |          |          | x                      |          |          |          |                                   |          |          | x        |                      | x  |   |   |
| no.12        |            | x        |          |          |          |          | x        |          |           | x        |           |                  |               | x                     |          |           | x        |                                  |          |          |          | x                      |          |          |          |                                   |          |          | x        |                      | x  |   |   |
| no.13        |            | x        |          |          |          |          | x        |          |           | x        |           |                  |               | x                     |          |           | x        |                                  |          |          |          | x                      |          |          |          |                                   |          |          | x        |                      | x  |   |   |
| no.14        |            | x        |          |          |          |          | x        |          |           | x        |           |                  |               | x                     |          |           | x        |                                  |          |          |          | x                      |          |          |          |                                   |          |          | x        |                      | x  |   |   |
| <b>Total</b> | <b>6</b>   | <b>4</b> | <b>3</b> | <b>1</b> | <b>0</b> | <b>5</b> | <b>4</b> | <b>3</b> | <b>11</b> | <b>2</b> | <b>1</b>  | <b>2</b>         | <b>9</b>      | <b>2</b>              | <b>3</b> | <b>10</b> | <b>4</b> | <b>1</b>                         | <b>2</b> | <b>8</b> | <b>3</b> | <b>2</b>               | <b>0</b> | <b>3</b> | <b>3</b> | <b>5</b>                          | <b>2</b> | <b>7</b> | <b>4</b> | <b>4</b>             |    |   |   |
